# Supplementary material for: Parental Quality of Life and Involvement in Intervention for Children or Adolescents with Autism Spectrum Disorders: A Systematic Review
Source: J Pers Med. 2021 Sep 8;11(9):894. doi: 10.3390/jpm11090894 (PMC8469292; doi:10.3390/jpm11090894)
Supplement: Supplementary file 1 [file jpm-11-00894-s001.zip › jpm-1349615-supplementary.pdf]

**Table S1**

*Full-text articles excluded, with reasons (n = 79)*

| REFERENCE                                                                                                                                                                                                                                                                                                                                                                                                                  | REASON FOR EXCLUSION  |
|----------------------------------------------------------------------------------------------------------------------------------------------------------------------------------------------------------------------------------------------------------------------------------------------------------------------------------------------------------------------------------------------------------------------------|-----------------------|
| 01. Alamri, D. A. F., Mahzari, Q. A., Shaqran, T., Albalawi, J. A., Alanazi, F. K., & Rheab. (2020). Impact of autism on parents/caregivers quality of life in Tabuk. <i>International Journal of Medical Research &amp; Health Sciences</i> , 9(1), 1–13.                                                                                                                                                                 | No intervention       |
| 02. Al-Farsi, O. A., Al-Farsi, Y. M., Al-Sharbati, M. M., Al-Adawi, S., Cucchi, A., Essa, M. M., & Qoronfleh, M. W. (2020). Quality of life of caregivers of autism spectrum disorder, intellectual disability and typically developing children: A comparison study. <i>Applied Research in Quality of Life</i> .                                                                                                         | No intervention       |
| 03. Arora, S., Goodall, S., Viney, R., & Einfeld, S. (2020). Health-related quality of life amongst primary caregivers of children with intellectual disability. <i>Journal of Intellectual Disability Research</i> , 64(2), 103–116. <a href="https://doi.org/10.1111/jir.12701">https://doi.org/10.1111/jir.12701</a>                                                                                                    | Non-pertinent outcome |
| 04. Avrech Bar, M., Shelef, L., & Bart, O. (2016). Do participation and self-efficacy of mothers to children with ASD predict their children's participation? <i>Research in Autism Spectrum Disorders</i> , 24, 1–10. <a href="https://doi.org/10.1016/j.rasd.2016.01.002">https://doi.org/10.1016/j.rasd.2016.01.002</a>                                                                                                 | No intervention       |
| 05. Bader, S. H., Barry, T. D., & Hann, J. A. H. (2015). The relation between parental expressed emotion and externalizing behaviors in children and adolescents with an autism spectrum disorder. <i>Focus on Autism and Other Developmental Disabilities</i> , 30(1), 23–34. <a href="https://doi.org/10.1177/1088357614523065">https://doi.org/10.1177/1088357614523065</a>                                             | No intervention       |
| 06. Benjak, T., Mavrinac, G. V., & Šimetin, I. P. (2009). Comparative study on self perceived health of parents of children with autism spectrum disorders and parents of nondisabled children in Croatia. In Mohammadi, MR (Ed.), <i>Croatian Medical Journal</i> (Vol. 50, Issue 4, pp. 403–409). <a href="https://doi.org/10.3325/cmj.2009.50.403">https://doi.org/10.3325/cmj.2009.50.403</a>                          | No intervention       |
| 07. Boehm, T. L., Carter, E. W., & Taylor, J. L. ound. (2015). Family quality of life during the transition to adulthood for individuals with intellectual disability and/or autism spectrum disorders. <i>American Journal on Intellectual and Developmental Disabilities</i> , 120(5), 395–411.                                                                                                                          | Non-pertinent outcome |
| 08. Bohadana, G., Morrissey, S., & Paynter, J. (2019). Self-compassion: A novel predictor of stress and quality of life in parents of children with autism spectrum disorder. <i>Journal of Autism and Developmental Disorders</i> , 49(10), 4039–4052.                                                                                                                                                                    | No intervention       |
| 09. Bravo-Benítez, J., Pérez-Marfil, M. N., Román-Alegre, B., & Cruz-Quintana, F. (2019). Grief experiences in family caregivers of children with autism spectrum disorder (ASD). <i>International Journal of Environmental Research and Public Health</i> , 16(23). <a href="https://doi.org/10.3390/ijerph16234821">https://doi.org/10.3390/ijerph16234821</a>                                                           | Non-pertinent outcome |
| 10. Broady, T. R., Stoyles, G. J., & Morse, C. (2017). Understanding carers' lived experience of stigma: The voice of families with a child on the autism spectrum. <i>Health and Social Care in the Community</i> , 25(1), 224–233. <a href="https://doi.org/10.1111/hsc.12297">https://doi.org/10.1111/hsc.12297</a>                                                                                                     | Non-pertinent outcome |
| 11. Cappe, É., Poirier, N., Sankey, C., Belzil, A., & Dionne, C. (2018). Quality of life of French Canadian parents raising a child with autism spectrum disorder and effects of psychosocial factors. <i>Quality of Life Research</i> , 27(4), 955–967. <a href="https://doi.org/10.1007/s11136-017-1757-4">https://doi.org/10.1007/s11136-017-1757-4</a>                                                                 | No intervention       |
| 12. Cappe, E., Wolff, M., Bobet, R., & Adrien, J. L. (2011). Quality of life: A key variable to consider in the evaluation of adjustment in parents of children with autism spectrum disorders and in the development of relevant support and assistance programmes. <i>Quality of Life Research</i> , 20(8), 1279–1294. <a href="https://doi.org/10.1007/s11136-011-9861-3">https://doi.org/10.1007/s11136-011-9861-3</a> | Non-pertinent outcome |
| 13. Chuang, I. C., Tseng, M. H., Lu, L., Shieh, J. Y., & Cermak, S. A. (2014). Predictors of the health-related quality of life in preschool children with autism spectrum disorders. <i>Research in Autism Spectrum Disorders</i> , 8(9), 1062–1070. <a href="https://doi.org/10.1016/j.rasd.2014.05.015">https://doi.org/10.1016/j.rasd.2014.05.015</a>                                                                  | No intervention       |
| 14. Craig, F., Operto, F. F., De Giacomo, A., Margari, L., Frolli, A., Conson, M., Ivagnes, S., Monaco, M., & Margari, F. (2016). Parenting stress among parents of children with neurodevelopmental disorders. <i>Psychiatry Research</i> , 242, 121–129. <a href="https://doi.org/10.1016/j.psychres.2016.05.016">https://doi.org/10.1016/j.psychres.2016.05.016</a>                                                     | No intervention       |

# REFERENCE

# REASON FOR EXCLUSION

|                                                                                                                                                                                                                                                                                                                                                                                                                                                                                                                                                                                   |                       |
|-----------------------------------------------------------------------------------------------------------------------------------------------------------------------------------------------------------------------------------------------------------------------------------------------------------------------------------------------------------------------------------------------------------------------------------------------------------------------------------------------------------------------------------------------------------------------------------|-----------------------|
| 15. Ede, M. O., Anyanwu, J. I., Onuigbo, L. N., Ifelunni, C. O., Alabi-Oparaocha, F. C., Okenyi, E. C., Agu, M. A., Ugwuanyi, L. T., Ugwuanyi, C., Eseadi, C., Awoke, N. N., Nweze, T., & Victor-Aigbodion, V. (2020). Rational emotive family health therapy for reducing parenting stress in families of children with autism spectrum disorders: A group randomized control study. <i>Journal of Rational - Emotive and Cognitive - Behavior Therapy</i> , 38(2), 243–271. <a href="https://doi.org/10.1007/s10942-020-00342-7">https://doi.org/10.1007/s10942-020-00342-7</a> | Non-pertinent outcome |
| 16. Fisher, E. B. (2013). The impact of child's severity on quality-of-life among parents of children with autism spectrum disorder: The mediating role of optimism. <i>Journal of the Medical Association of Thailand = Chotmaihet Thangphaet</i> , 96(10), 1313–1318.                                                                                                                                                                                                                                                                                                           | No intervention       |
| 17. Frantz, R., Hansen, S. G., Squires, J., & Machalicek, W. (2018). Families as partners: Supporting family resiliency through early intervention. <i>Infants and Young Children</i> , 31(1), 3–19. <a href="https://doi.org/10.1097/IYC.000000000000109">https://doi.org/10.1097/IYC.000000000000109</a>                                                                                                                                                                                                                                                                        | Non pertinent         |
| 18. García-López, C., Sarriá, E., & Pozo, P. (2016). Parental self-efficacy and positive contributions regarding autism spectrum condition: An actor-partner interdependence model. <i>Journal of Autism and Developmental Disorders</i> , 46(7), 2385–2398. <a href="https://doi.org/10.1007/s10803-016-2771-z">https://doi.org/10.1007/s10803-016-2771-z</a>                                                                                                                                                                                                                    | Non-pertinent outcome |
| 19. Gardiner, E., & Iarocci, G. (2015). Family quality of life and asd: The role of child adaptive functioning and behavior problems. <i>Autism Research</i> , 8(2), 199–213. <a href="https://doi.org/10.1002/aur.1442">https://doi.org/10.1002/aur.1442</a>                                                                                                                                                                                                                                                                                                                     | No intervention       |
| 20. Garrido, D., Carballo, G., & Garcia-Retamero, R. (2020). Siblings of children with autism spectrum disorders: Social support and family quality of life. <i>Quality of Life Research</i> , 29(5), 1193–1202. <a href="https://doi.org/10.1007/s11136-020-02429-1">https://doi.org/10.1007/s11136-020-02429-1</a>                                                                                                                                                                                                                                                              | No intervention       |
| 21. Giallo, R., Wood, C. E., Jellett, R., & Porter, R. (2013). Fatigue, wellbeing and parental self-efficacy in mothers of children with an autism spectrum disorder. <i>Autism</i> , 17(4), 465–480. <a href="https://doi.org/10.1177/1362361311416830">https://doi.org/10.1177/1362361311416830</a>                                                                                                                                                                                                                                                                             | No intervention       |
| 22. Giovagnoli, G., Postorino, V., Fatta, L. M., Sanges, V., De Peppo, L., Vassena, L., Rose, P. De, Vicari, S., & Mazzone, L. (2015). Behavioral and emotional profile and parental stress in preschool children with autism spectrum disorder. <i>Research in Developmental Disabilities</i> , 45–46, 411–421. <a href="https://doi.org/10.1016/j.ridd.2015.08.006">https://doi.org/10.1016/j.ridd.2015.08.006</a>                                                                                                                                                              | No intervention       |
| 23. Goedeke, S., Shepherd, D., Landon, J., & Taylor, S. (2019). How perceived support relates to child autism symptoms and care-related stress in parents caring for a child with autism. <i>Research in Autism Spectrum Disorders</i> , 60(January), 36–47. <a href="https://doi.org/10.1016/j.rasd.2019.01.005">https://doi.org/10.1016/j.rasd.2019.01.005</a>                                                                                                                                                                                                                  | No intervention       |
| 24. Gowda, G. S., Komal, S., Sanjay, T. N., Mishra, S., Kumar, C. N., & Math, S. B. (2019). Sociodemographic, legal, and clinical profiles of female forensic inpatients in Karnataka: A retrospective study. <i>Indian Journal of Psychological Medicine</i> , 41(2), 138–143. <a href="https://doi.org/10.4103/IJPSYM.IJPSYM">https://doi.org/10.4103/IJPSYM.IJPSYM</a>                                                                                                                                                                                                         | Non pertinent         |
| 25. Harrop, C., McBee, M., & Boyd, B. A. (2016). How are child restricted and repetitive behaviors associated with caregiver stress over time? A parallel process multilevel growth model. <i>Journal of Autism and Developmental Disorders</i> , 46(5), 1773–1783. <a href="https://doi.org/10.1007/s10803-016-2707-7">https://doi.org/10.1007/s10803-016-2707-7</a>                                                                                                                                                                                                             | Non-pertinent outcome |
| 26. Hou, Y. M., Stewart, L., Iao, L. S., & Wu, C. C. (2018). Parenting stress and depressive symptoms in Taiwanese mothers of young children with autism spectrum disorder: Association with children's behavioural problems. <i>Journal of Applied Research in Intellectual Disabilities</i> , 31(6), 1113–1121. <a href="https://doi.org/10.1111/jar.12471">https://doi.org/10.1111/jar.12471</a>                                                                                                                                                                               | Non-pertinent outcome |
| 27. Hsiao, Y. J. (2018). Autism spectrum disorders: Family demographics, parental stress, and family quality of life. <i>Journal of Policy and Practice in Intellectual Disabilities</i> , 15(1), 70–79.                                                                                                                                                                                                                                                                                                                                                                          | No intervention       |
| 28. Huang, Y. P., Chang, M. Y., Chi, Y. L., & Lai, F. C. (2014). Health-related quality of life in fathers of children with or without developmental disability: The mediating effect of parental stress. <i>Quality of Life Research</i> , 23(1), 175–183.                                                                                                                                                                                                                                                                                                                       | No intervention       |
| 29. Iadarola, S., Levato, L., Harrison, B., Smith, T., Lecavalier, L., Johnson, C., Swiezy, N., Bearss, K., & Scahill, L. (2018). Teaching parents behavioral strategies for Autism Spectrum Disorder (ASD): Effects on stress, strain, and competence. <i>Journal of Autism and Developmental Disorders</i> , 48(4), 1031–1040.                                                                                                                                                                                                                                                  | No intervention       |

| REFERENCE                                                                                                                                                                                                                                                                                                                                                                                                                                                                   | REASON FOR EXCLUSION  |
|-----------------------------------------------------------------------------------------------------------------------------------------------------------------------------------------------------------------------------------------------------------------------------------------------------------------------------------------------------------------------------------------------------------------------------------------------------------------------------|-----------------------|
| 30. Ingersoll, B., & Berger, N. I. (2015). Parent engagement with a telehealth-based parent-mediated intervention program for children with autism spectrum disorders: Predictors of program use and parent outcomes. <i>Journal of Medical Internet Research</i> , 17(10). <a href="https://doi.org/10.2196/jmir.4913">https://doi.org/10.2196/jmir.4913</a>                                                                                                               | Non-pertinent outcome |
| 31. Ji, B., Zhao, I., Turner, C., Sun, M., Yi, R., & Tang, S. (2014). Predictors of health-related quality of life in Chinese caregivers of children with autism spectrum disorders: A cross-sectional study. <i>Archives of Psychiatric Nursing</i> , 28(5), 327–332. <a href="https://doi.org/10.1016/j.apnu.2014.06.001">https://doi.org/10.1016/j.apnu.2014.06.001</a>                                                                                                  | No intervention       |
| 32. Kahana, E., Lee, J. E., Kahana, J., Goler, T., Kahana, B., Shick, S., Burk, E., & Barnes, K. (2015). Advancing the field. Childhood autism and proactive family coping: Intergenerational perspectives. <i>Journal of Intergenerational Relationships</i> , 13(2), 150–166.                                                                                                                                                                                             | No empirical data     |
| 33. Kandeger, A., Guler, H. A., Egilmez, U., & Guler, O. (2018). Major depressive disorder comorbid severe hydrocephalus caused by Arnold – Chiari malformation Does exposure to a seclusion and restraint event during clerkship influence medical student’ s attitudes toward psychiatry? <i>Indian Journal of Psychiatry</i> , 59(4), 2017–2018. <a href="https://doi.org/10.4103/psychiatry.IndianJPsychiatry">https://doi.org/10.4103/psychiatry.IndianJPsychiatry</a> | Non pertinent         |
| 34. Karst, J. S., & van Hecke, A. V. (2012). Parent and family impact of autism spectrum disorders: A review and proposed model for intervention evaluation. <i>Clinical Child and Family Psychology Review</i> , 15(3), 247–277.                                                                                                                                                                                                                                           | No empirical data     |
| 35. Khanna, R., Madhavan, S. S., Smith, M. J., Patrick, J. H., Tworek, C., & Becker-Cottrill, B. (2011). Assessment of health-related quality of life among primary caregivers of children with autism spectrum disorders. <i>Journal of Autism and Developmental Disorders</i> , 41(9), 1214–1227. <a href="https://doi.org/10.1007/s10803-010-1140-6">https://doi.org/10.1007/s10803-010-1140-6</a>                                                                       | No intervention       |
| 36. Kousha, M., Attar, H. A., & Shoar, Z. (2016). Anxiety, depression, and quality of life in Iranian mothers of children with autism spectrum disorder. <i>Journal of Child Health Care</i> , 20(3), 405–414. <a href="https://doi.org/10.1177/1367493515598644">https://doi.org/10.1177/1367493515598644</a>                                                                                                                                                              | No intervention       |
| 37. Kuhlthau, K., Payakachat, N., Delahaye, J., Hurson, J., Pyne, J. M., Kovacs, E., & Tilford, J. M. (2014). Quality of life for parents of children with autism spectrum disorders. <i>Research in Autism Spectrum Disorders</i> , 8(10), 1339–1350.                                                                                                                                                                                                                      | No intervention       |
| 38. Kuru, N., & Piyal, B. (2018). Perceived social support and quality of life of parents of children with autism. <i>Nigerian Journal of Clinical Practice</i> , 21(9), 1182–1189. <a href="https://doi.org/10.4103/njcp.njcp_13_18">https://doi.org/10.4103/njcp.njcp_13_18</a>                                                                                                                                                                                           | No intervention       |
| 39. Lei, X., & Kantor, J. (2020). Social support and family quality of life in Chinese families of children with autism spectrum disorder: The mediating role of family cohesion and adaptability. <i>International Journal of Developmental Disabilities</i> . <a href="https://doi.org/10.1080/20473869.2020.1803706">https://doi.org/10.1080/20473869.2020.1803706</a>                                                                                                   | No intervention       |
| 40. Lin, Y. N., Iao, L. S., Lee, Y. H., & Wu, C. C. (2020). Parenting stress and child behavior problems in young children with autism spectrum disorder: Transactional relations across time. <i>Journal of Autism and Developmental Disorders</i> .                                                                                                                                                                                                                       | Non-pertinent outcome |
| 41. Lord, C., Brugha, T. S., Charman, T., Cusack, J., Dumas, G., Frazier, T., Jones, E. J. H., Jones, R. M., Pickles, A., State, M. W., Taylor, J. L., & Veenstra-VanderWeele, J. (2018). Autism spectrum disorder. <i>Nature Reviews Disease Primers</i> , 6(1), 5. <a href="https://doi.org/10.1038/s41572-019-0138-4">https://doi.org/10.1038/s41572-019-0138-4</a>                                                                                                      | No empirical data     |
| 42. Lovell, B., & Wetherell, M. A. (2020). Exploring the moderating role of benefit finding on the relationship between child problematic behaviours and psychological distress in caregivers of children with ASD. <i>Journal of Autism and Developmental Disorders</i> , 50(2), 617–624. <a href="https://doi.org/10.1007/s10803-019-04300-w">https://doi.org/10.1007/s10803-019-04300-w</a>                                                                              | No intervention       |
| 43. Lu, M. H., Wang, G. H., Lei, H., Shi, M. L., Zhu, R., & Jiang, F. (2018). Social support as mediator and moderator of the relationship between parenting stress and life satisfaction among the Chinese parents of children with ASD. <i>Journal of Autism and Developmental Disorders</i> , 48(4), 1181–1188. <a href="https://doi.org/10.1007/s10803-017-3448-y">https://doi.org/10.1007/s10803-017-3448-y</a>                                                        | No intervention       |
| 44. Lu, M., Yang, G., Skora, E., Wang, G., Cai, Y., Sun, Q., & Li, W. (2015). Self-esteem, social support, and life satisfaction in Chinese parents of children with autism spectrum disorder. <i>Research in Autism Spectrum Disorders</i> , 17, 70–77. <a href="https://doi.org/10.1016/j.rasd.2015.05.003">https://doi.org/10.1016/j.rasd.2015.05.003</a>                                                                                                                | No intervention       |

# REFERENCE

# REASON FOR EXCLUSION

|                                                                                                                                                                                                                                                                                                                                                                                                                   |                       |
|-------------------------------------------------------------------------------------------------------------------------------------------------------------------------------------------------------------------------------------------------------------------------------------------------------------------------------------------------------------------------------------------------------------------|-----------------------|
| 45. Lushin, V., & O'Brien, K. H. (2016). Parental Mental Health: Addressing the unmet needs of caregivers for children with autism spectrum disorders. <i>Journal of the American Academy of Child and Adolescent Psychiatry</i> , 55(12), 1013–1015. <a href="https://doi.org/10.1016/j.jaac.2016.09.507">https://doi.org/10.1016/j.jaac.2016.09.507</a>                                                         | No empirical data     |
| 46. Markowitz, L. A., Reyes, C., Embacher, R. A., Speer, L. L., Roizen, N., & Frazier, T. W. (2016). Development and psychometric evaluation of a psychosocial quality-of-life questionnaire for individuals with autism and related developmental disorders. <i>Autism</i> , 20(7), 832–844. <a href="https://doi.org/10.1177/1362361315611382">https://doi.org/10.1177/1362361315611382</a>                     | No intervention       |
| 47. Meadan, H., Halle, J. W., & Ebata, A. T. (2010). Families with children who have autism spectrum disorders: Stress and support. <i>Exceptional Children</i> , 77(1), 7–36.                                                                                                                                                                                                                                    | No empirical data     |
| 48. Mello, C., Rivard, M., Terroux, A., & Mercier, C. (2019). Quality of life in families of young children with autism spectrum disorder. <i>American Journal on Intellectual and Developmental Disabilities</i> , 124(6), 535–548.                                                                                                                                                                              | Non-pertinent outcome |
| 49. Millau, M., Rivard, M., & Mello, C. (2019). Quality of life in immigrant parents of children with autism spectrum disorder: A comparison with parents from the host culture. <i>Journal of Child and Family Studies</i> , 28(6), 1512–1523. <a href="https://doi.org/10.1007/s10826-019-01395-8">https://doi.org/10.1007/s10826-019-01395-8</a>                                                               | No intervention       |
| 50. Mugno, D., Ruta, L., D'Arrigo, V. G., & Mazzone, L. (2007). Impairment of quality of life in parents of children and adolescents with pervasive developmental disorder. <i>Health and Quality of Life Outcomes</i> , 5. <a href="https://doi.org/10.1186/1477-7525-5-22">https://doi.org/10.1186/1477-7525-5-22</a>                                                                                           | No intervention       |
| 51. Özgör, B. G., Aksu, H., & Eser, E. (2018). Factors affecting quality of life of caregivers of children diagnosed with autism spectrum disorder. <i>Indian Journal of Psychiatry</i> , 60(3), 278–285. <a href="https://doi.org/10.4103/psychiatry.IndianJPsychiatry_300_17">https://doi.org/10.4103/psychiatry.IndianJPsychiatry_300_17</a>                                                                   | No intervention       |
| 52. Plaza, J. C., Rico, G. M., & Grau-Sevilla, M. D. (2020). Coping strategies of fathers in early intervention services and parenting stress levels. <i>Journal of Psychological and Educational Research</i> , 28(2), 119–145.                                                                                                                                                                                  | Non-pertinent outcome |
| 53. Pozo, P., Sarriá, E., & Brioso, A. (2014). Family quality of life and psychological well-being in parents of children with autism spectrum disorders: A double ABCX model. <i>Journal of Intellectual Disability Research</i> , 58(5), 442–458. <a href="https://doi.org/10.1111/jir.12042">https://doi.org/10.1111/jir.12042</a>                                                                             | No intervention       |
| 54. Pruitt, M. M., Willis, K., Timmons, L., & Ekas, N. V. (2016). The impact of maternal, child, and family characteristics on the daily well-being and parenting experiences of mothers of children with autism spectrum disorder. <i>Autism</i> , 20(8), 973–985. <a href="https://doi.org/10.1177/1362361315620409">https://doi.org/10.1177/1362361315620409</a>                                               | No intervention       |
| 55. Rayan, A., & Ahmad, M. (2016). Effectiveness of mindfulness-based interventions on quality of life and positive reappraisal coping among parents of children with autism spectrum disorder. <i>Research in Developmental Disabilities</i> , 55, 185–196. <a href="https://doi.org/10.1016/j.ridd.2016.04.002">https://doi.org/10.1016/j.ridd.2016.04.002</a>                                                  | No empirical data     |
| 56. Reed, P., & Osborne, L. A. (2012). Diagnostic practice and its impacts on parental health and child behaviour problems in autism spectrum disorders. <i>Archives of Disease in Childhood</i> , 97(10), 927–931.                                                                                                                                                                                               | Non-pertinent outcome |
| 57. Reed, P., & Osborne, L. A. (2019). Reaction to diagnosis and subsequent health in mothers of children with autism spectrum disorder. <i>Autism</i> , 23(6), 1442–1448. <a href="https://doi.org/10.1177/1362361318815641">https://doi.org/10.1177/1362361318815641</a>                                                                                                                                        | Non-pertinent outcome |
| 58. Rivard, M., Morin, M., Mercier, C., Terroux, A., Mello, C., & Lépine, A. (2017). Social validity of a training and coaching program for parents of children with autism spectrum disorder on a waiting list for early behavioral intervention. <i>Journal of Child and Family Studies</i> , 26(3), 877–887. <a href="https://doi.org/10.1007/s10826-016-0604-5">https://doi.org/10.1007/s10826-016-0604-5</a> | Non-pertinent outcome |
| 59. Robert, M., Leblanc, L., & Boyer, T. (2015). When satisfaction is not directly related to the support services received: Understanding parents' varied experiences with specialised services for children with developmental disabilities. <i>British Journal of Learning Disabilities</i> , 43(3), 168–177. <a href="https://doi.org/10.1111/bld.12092">https://doi.org/10.1111/bld.12092</a>                | Non-pertinent outcome |

## REFERENCE

## REASON FOR EXCLUSION

|                                                                                                                                                                                                                                                                                                                                                                                                     |                       |
|-----------------------------------------------------------------------------------------------------------------------------------------------------------------------------------------------------------------------------------------------------------------------------------------------------------------------------------------------------------------------------------------------------|-----------------------|
| 60. Rossetti, K. G., & Zlomke, K. R. (2021). Resourcefulness revisited: Further psychometric evaluation of resourcefulness scale. <i>Stress and Health</i> .                                                                                                                                                                                                                                        | No empirical data     |
| 61. Russa, M. B., Matthews, A. L., & Owen-DeSchryver, J. S. (2015). Expanding supports to improve the lives of families of children with autism spectrum disorder. <i>Journal of Positive Behavior Interventions</i> , 17(2), 95–104.                                                                                                                                                               | Non-pertinent outcome |
| 62. Schertz, H. H., Lester, J. N., Erden, E., Safran, S., & Githens, P. (2020). Challenges and contributors to self-efficacy for caregivers of toddlers with autism. <i>Autism</i> , 24(5), 1260–1272.                                                                                                                                                                                              | No intervention       |
| 63. Schlebusch, L., Dada, S., & Samuels, A. E. (2017). Family quality of life of South African families raising children with autism spectrum disorder. <i>Journal of Autism and Developmental Disorders</i> , 47(7), 1966–1977. <a href="https://doi.org/10.1007/s10803-017-3102-8">https://doi.org/10.1007/s10803-017-3102-8</a>                                                                  | No intervention       |
| 64. Selvakumar, N., & Panicker, A. (2020). Stress and coping styles in mothers of children with autism spectrum disorder. <i>Indian Journal of Psychological Medicine</i> , 42(3), 225–232. <a href="https://doi.org/10.4103/IJPSYM.IJPSYM_333_19">https://doi.org/10.4103/IJPSYM.IJPSYM_333_19</a>                                                                                                 | Non-pertinent outcome |
| 65. Shu, B. C., & Lung, F. W. (2005). The effect of support group on the mental health and quality of life for mothers with autistic children. <i>Journal of Intellectual Disability Research</i> , 49(1), 47–53.                                                                                                                                                                                   | No intervention       |
| 66. Sim, A., Cordier, R., Vaz, S., Parsons, R., & Falkmer, T. (2017). Relationship satisfaction and dyadic coping in couples with a child with autism spectrum disorder. <i>Journal of Autism and Developmental Disorders</i> , 47(11), 3562–3573. <a href="https://doi.org/10.1007/s10803-017-3275-1">https://doi.org/10.1007/s10803-017-3275-1</a>                                                | No intervention       |
| 67. Srinivasaraghavan, R., Koshy, B., Devarajan, C., Beulah, R., & Glory, L. (2020). The impact of autism spectrum disorder in comparison with other neuro-developmental disorders in children on the family: Single centre experience. <i>Indian Journal of Psychological Medicine</i> , 42(3), 233–237. <a href="https://doi.org/10.4103/IJPSYM.IJPSYM">https://doi.org/10.4103/IJPSYM.IJPSYM</a> | No intervention       |
| 68. Stošić, J., Frey Škrinjar, J., & Preece, D. (2020). Families of children on the autism spectrum: Experience of daily life and impact of parent education. <i>Support for Learning</i> , 35(2), 205–221. <a href="https://doi.org/10.1111/1467-9604.12300">https://doi.org/10.1111/1467-9604.12300</a>                                                                                           | No intervention       |
| 69. Tarver, J., Pearson, E., Edwards, G., Shirazi, A., Potter, L., Malhi, P., & Waite, J. (2020). Anxiety in autistic individuals who speak few or no words: A qualitative study of parental experience and anxiety management. <i>Autism</i> , 25(2), 429–439. <a href="https://doi.org/10.1177/1362361320962366">https://doi.org/10.1177/1362361320962366</a>                                     | Non-pertinent outcome |
| 70. Taub, T., & Werner, S. (2016). What support resources contribute to family quality of life among religious and secular Jewish families of children with developmental disability? <i>Journal of Intellectual and Developmental Disability</i> , 41(4), 348–359. <a href="https://doi.org/10.3109/13668250.2016.1228859">https://doi.org/10.3109/13668250.2016.1228859</a>                       | Non-pertinent outcome |
| 71. Tehee, E., Honan, R., & Hevey, D. (2009). Factors contributing to stress in parents of individuals with autistic spectrum disorders. <i>Journal of Applied Research in Intellectual Disabilities</i> , 22(1), 34–42.                                                                                                                                                                            | Non-pertinent outcome |
| 72. Tekola, B., Kinf, M., Girma, F., Hanlon, C., & Hoekstra, R. A. (2020). Perceptions and experiences of stigma among parents of children with developmental disorders in Ethiopia: A qualitative study. <i>Social Science and Medicine</i> , 256. <a href="https://doi.org/10.1016/j.socscimed.2020.113034">https://doi.org/10.1016/j.socscimed.2020.113034</a>                                   | No intervention       |
| 73. Torbet, S., Proeve, M., & Roberts, R. M. (2019). Self-compassion: A protective factor for parents of children with autism spectrum disorder. <i>Mindfulness</i> , 10(12), 2492–2506. <a href="https://doi.org/10.1007/s12671-019-01224-5">https://doi.org/10.1007/s12671-019-01224-5</a>                                                                                                        | Non pertinent         |
| 74. Tümlü, C., & Akdoğan, R. (2019). Looking at life through a different window: Group counselling for the mothers of disabled children. <i>International Journal for the Advancement of Counselling</i> , 41(2), 252–271. <a href="https://doi.org/10.1007/s10447-019-09373-x">https://doi.org/10.1007/s10447-019-09373-x</a>                                                                      | No intervention       |

## REFERENCE

## REASON FOR EXCLUSION

|                                                                                                                                                                                                                                                                                                                                                                                                                 |                       |
|-----------------------------------------------------------------------------------------------------------------------------------------------------------------------------------------------------------------------------------------------------------------------------------------------------------------------------------------------------------------------------------------------------------------|-----------------------|
| 75. Wakimizu, R., Yamaguchi, K., & Fujioka, H. (2017). Family empowerment and quality of life of parents raising children with developmental disabilities in 78 Japanese families. <i>International Journal of Nursing Sciences</i> , 4(1), 38–45. <a href="https://doi.org/10.1016/j.ijnss.2016.12.004">https://doi.org/10.1016/j.ijnss.2016.12.004</a>                                                        | No intervention       |
| 76. Walton, K. M. (2019). Leisure time and family functioning in families living with autism spectrum disorder. <i>Autism</i> , 23(6), 1384–1397.                                                                                                                                                                                                                                                               | Non-pertinent outcome |
| 77. Weitlauf, A. S., Broderick, N., Stainbrook, J. A., Taylor, J. L., Herrington, C. G., Nicholson, A. G., Santulli, M., Dykens, E. M., Juárez, A. P., & Warren, Z. E. (2020). Mindfulness-based stress reduction for parents implementing early intervention for autism: An RCT. <i>Pediatrics</i> , 145, 81–92. <a href="https://doi.org/10.1542/peds.2019-1895K">https://doi.org/10.1542/peds.2019-1895K</a> | No intervention       |
| 78. Weitlauf, A. S., Vehorn, A. C., Taylor, J. L., & Warren, Z. E. (2014). Relationship satisfaction, parenting stress, and depression in mothers of children with autism. <i>Autism</i> , 18(2), 194–198. <a href="https://doi.org/10.1177/1362361312458039">https://doi.org/10.1177/1362361312458039</a>                                                                                                      | No intervention       |
| 79. Wicks, R., Paynter, J., & Adams, D. (2019). Exploring the predictors of family outcomes of early intervention for children on the autism spectrum: An Australian cohort study. <i>Journal of Early Intervention</i> . <a href="https://doi.org/10.1177/1053815119883413">https://doi.org/10.1177/1053815119883413</a>                                                                                       | Non pertinent outcome |
